# Supplementary material for: Human Papillomavirus Same Genotype Persistence and Risk of Cervical Intraepithelial Neoplasia2+ Recurrence
Source: MDPI journal article supplement (doi:10.3390/cancers13153664), 2021-07-21
Supplement: s1 [file s1]

# Supplementary Materials: Human Papillomavirus Same Genotype Persistence and Risk of Cervical Intraepithelial Neoplasia 2+ Recurrence

Anna Daniela Iacobone, Davide Radice, Maria Teresa Sandri, Eleonora Petra Preti, Maria Elena Guerrieri, Ailyn Mariela Vidal Urbinati, Ida Pino, Dorella Franchi, Rita Passerini and Fabio Bottari

**Table S1.** Transition probabilities at 3–9 months (first follow-up visit) by baseline infection status, *N* (row %).

| Baseline                   | Follow-up  |           |           |
|----------------------------|------------|-----------|-----------|
|                            | Negative   | Single    | Multiple  |
| Single ( <i>N</i> = 296)   | 236 (79.7) | 55 (18.6) | 5 (1.7)   |
| Multiple ( <i>N</i> = 112) | 76 (67.9)  | 19 (17.0) | 17 (15.2) |

Symmetry test, *p* = 0.001.

**Table S2.** Transition probabilities at 3–9 months (first follow-up visit) by baseline number of infections, *N* (row %).

| No. of infections at baseline | No. of infections at follow-up, <i>N</i> (row %) |           |          |          |
|-------------------------------|--------------------------------------------------|-----------|----------|----------|
|                               | Negative                                         | 1         | 2        | ≥3       |
| 1 ( <i>N</i> = 296)           | 236 (79.7)                                       | 55 (18.6) | 5 (1.7)  | 0        |
| 2 ( <i>N</i> = 83)            | 60 (72.3)                                        | 14 (16.9) | 9 (10.8) | 0        |
| ≥3 ( <i>N</i> = 29)           | 16 (55.2)                                        | 5 (17.2)  | 4 (13.8) | 4 (13.8) |

Symmetry test, *p* = 0.001.

**Table S3.** Infections status at baseline and at first follow-up visit by histology.

| Histology  | Baseline <sup>a</sup> |                     |                     | Follow-up <sup>b</sup> |                    |
|------------|-----------------------|---------------------|---------------------|------------------------|--------------------|
|            | N (column %)          |                     |                     | N (column %)           |                    |
|            | Single<br>N = 296     | Multiple<br>N = 112 | Negative<br>N = 312 | Single<br>N = 74       | Multiple<br>N = 22 |
| CIN1       | 50 (16.9)             | 22 (19.4)           | 59 (18.9)           | 9 (12.2)               | 4 (18.2)           |
| CIN2/3/AIS | 227 (76.7)            | 86 (76.8)           | 232 (74.4)          | 63 (85.1)              | 18 (81.8)          |
| ICC        | 19 (6.4)              | 4 (3.6)             | 21 (6.7)            | 2 (2.7)                | 0                  |

Fisher's exact test, <sup>a</sup> *p* = 0.49; <sup>b</sup> *p* = 0.30.

**Table S4.** Cumulative Relapse Incidence at 2-years from first follow-up by HPV16 status in persistent patients with one HR genotype only (*N* = 74).

| HPV 16 Status    | Events/At risk | Cumulative Incidence<br>(95% CI) | <i>p</i> -value <sup>a</sup> |
|------------------|----------------|----------------------------------|------------------------------|
| Overall          | 14/74          | 26.2 (14.1–40.2)                 | -                            |
| HPV 16-/Other HR | 5/32           | 24.8 (8.3–45.7)                  |                              |
| HPV 16+          | 9/42           | 28.5 (11.6–48.2)                 | 0.68                         |

<sup>a</sup> Gray's test.
